# Supplementary material for: ICP-MS-assisted proteomics approach to the identification of selenium-containing proteins in selenium-rich yeast
Source: Royal Society of Chemistry journal article supplement (doi:10.1039/b713805a), 2008-01-01
Supplement: b713805a.pdf [file b713805a.pdf]

## SUPPLEMENTARY INFORMATION

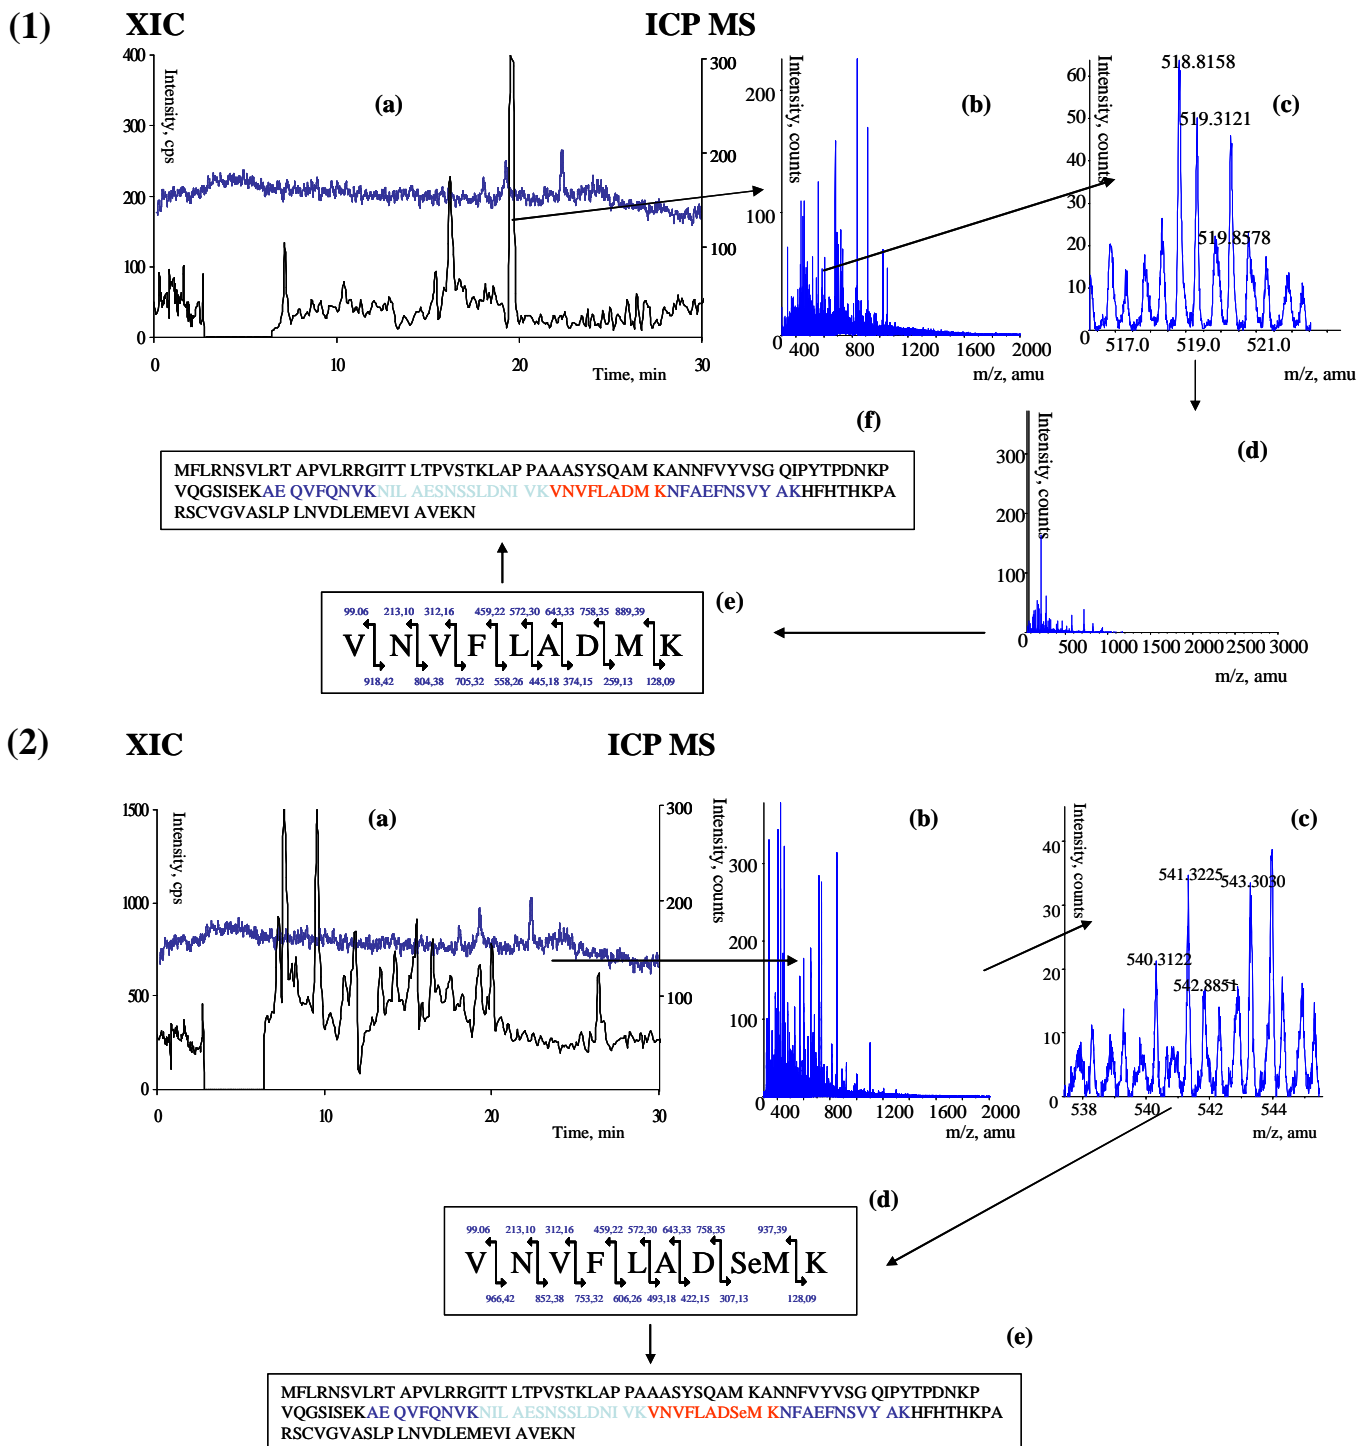

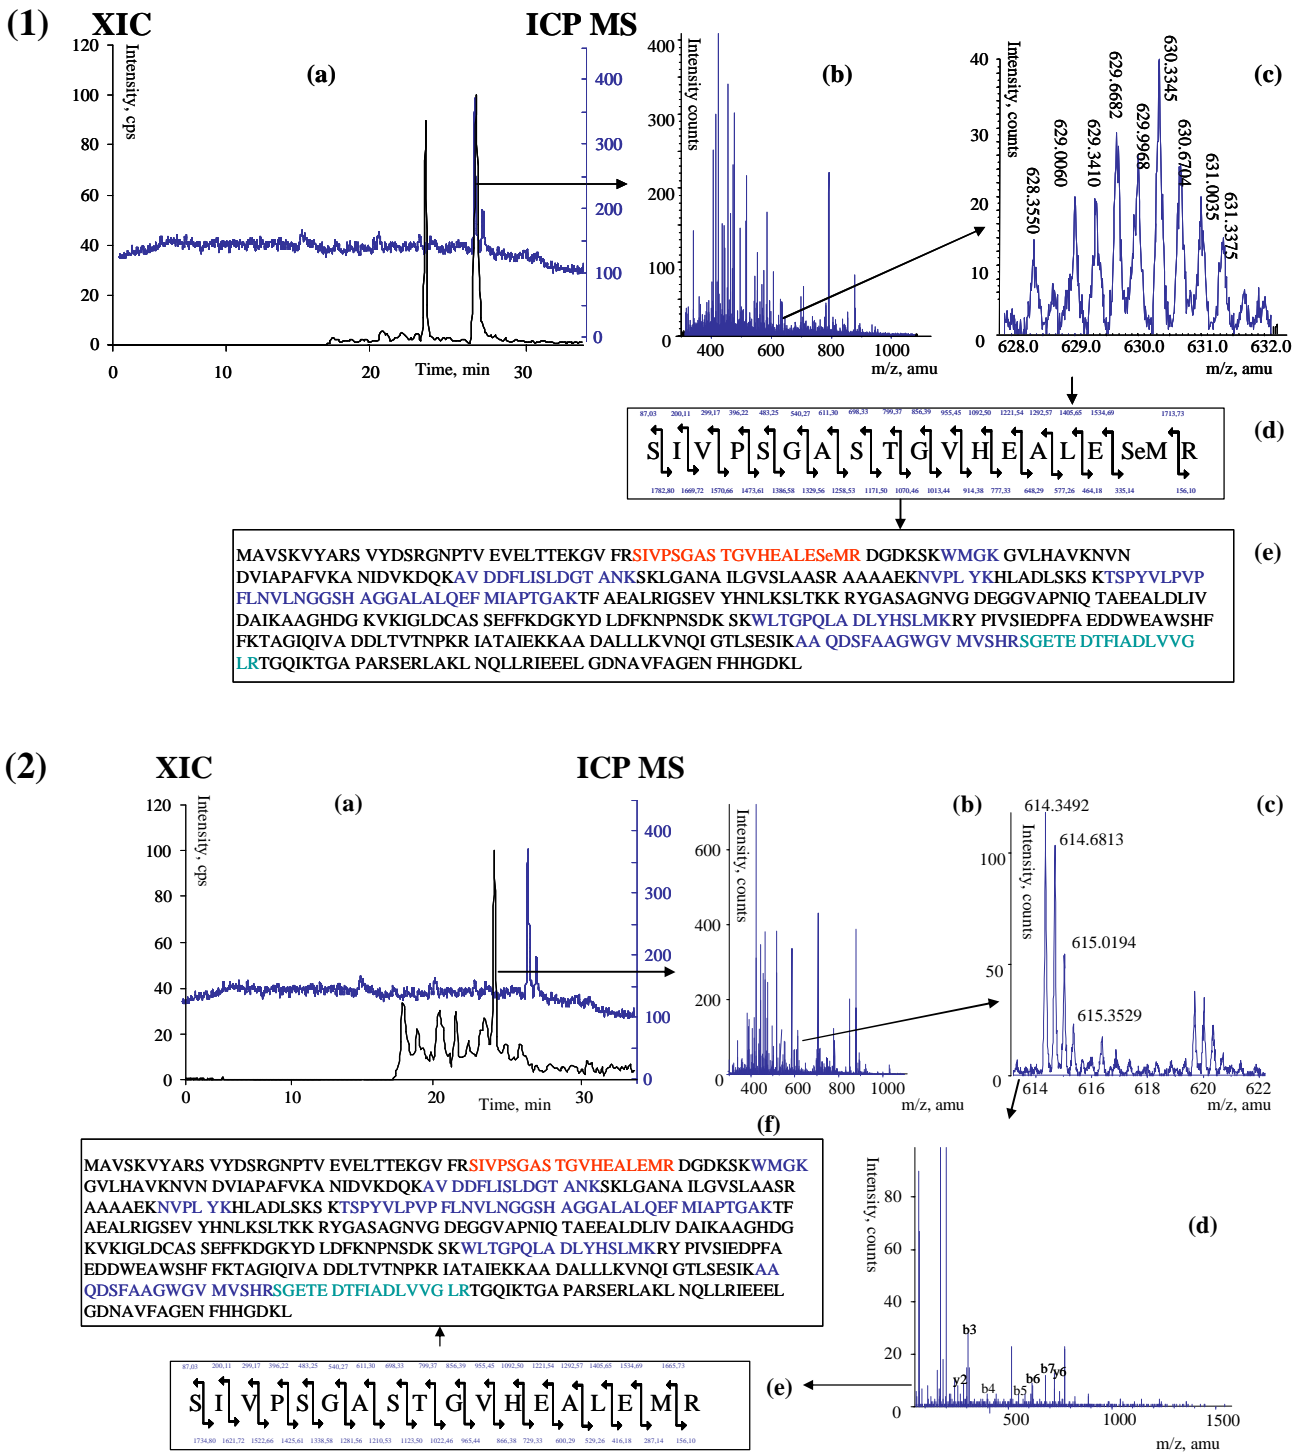

**Figure 2:** Spot 1. Identification of selenium – containing Enolase I.

(1) : Identification of the selenium - containing protein (a) : NanoHPLC-ICP MS and NanoHPLC-ESI MS/MS analysis. (b) : ESI MS spectrum. (c) : Zoom of the ESI MS spectrum, Se-peptide detection by characteristic isotopic pattern. (d) : Peptide sequence identified. (e) : Sequence of the selenium - containing protein identified by database search.

(2) : Identification of the sulfur homologue (a) : NanoHPLC-ICP MS and nanoHPLC-ESI MS/MS analysis. (b) : ESI MS spectrum. (c) : Zoom of the ESI MS spectrum, S-peptide detection by characteristic isotopic pattern. (d) : ESI MS/MS spectrum. (e) : Peptide sequence identified. (f) : Sequence of the sulfur - containing protein identified by database search.

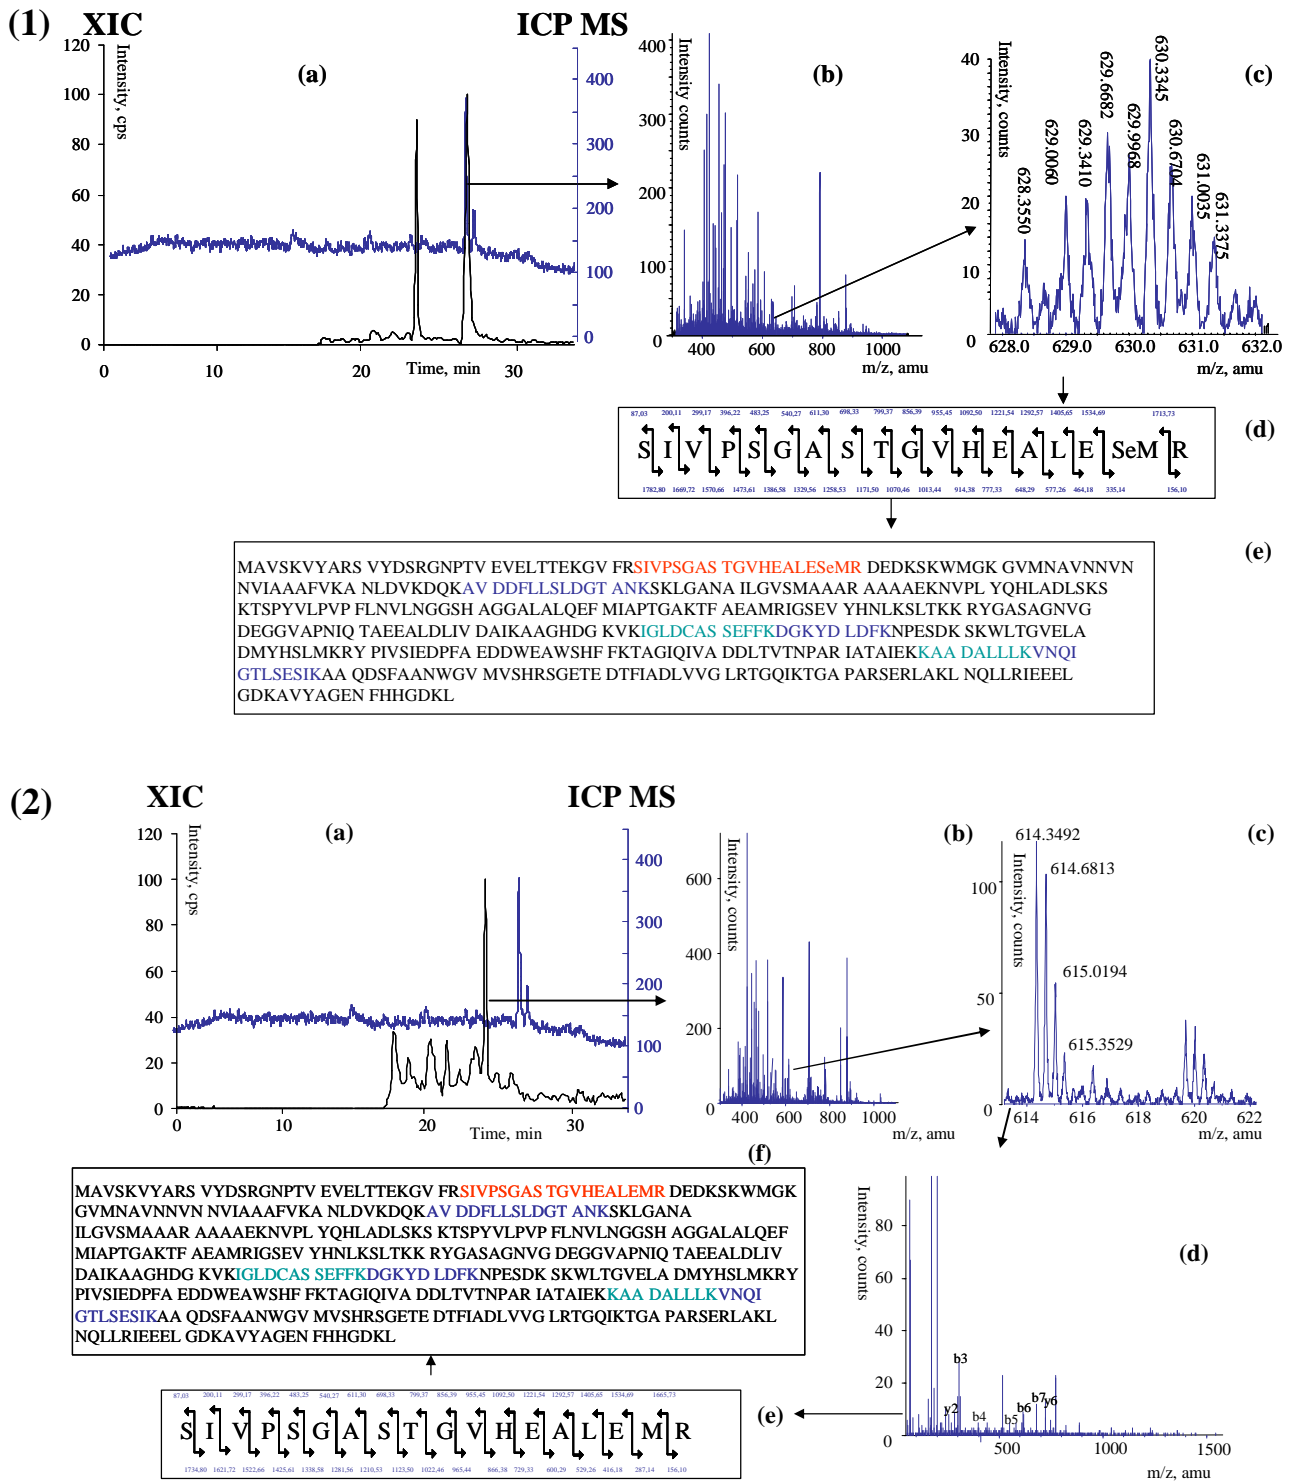

**Figure 3:** Spot 1. Identification of selenium – containing Enolase II.

- (1) : Identification of the selenium - containing protein (a) : NanoHPLC-ICP MS and NanoHPLC-ESI MS/MS analysis. (b) : ESI MS spectrum. (c) : Zoom of the ESI MS spectrum, Se-peptide detection by characteristic isotopic pattern. (d) : Peptide sequence identified. (e) : Sequence of the selenium - containing protein identified by database search.
- (2) : Identification of the sulfur homologue (a) : NanoHPLC-ICP MS and nanoHPLC-ESI MS/MS analysis. (b) : ESI MS spectrum. (c) : Zoom of the ESI MS spectrum, S-peptide detection by characteristic isotopic pattern. (d) : ESI MS/MS spectrum. (e) : Peptide sequence identified. (f) : Sequence of the sulfur - containing protein identified by database search.

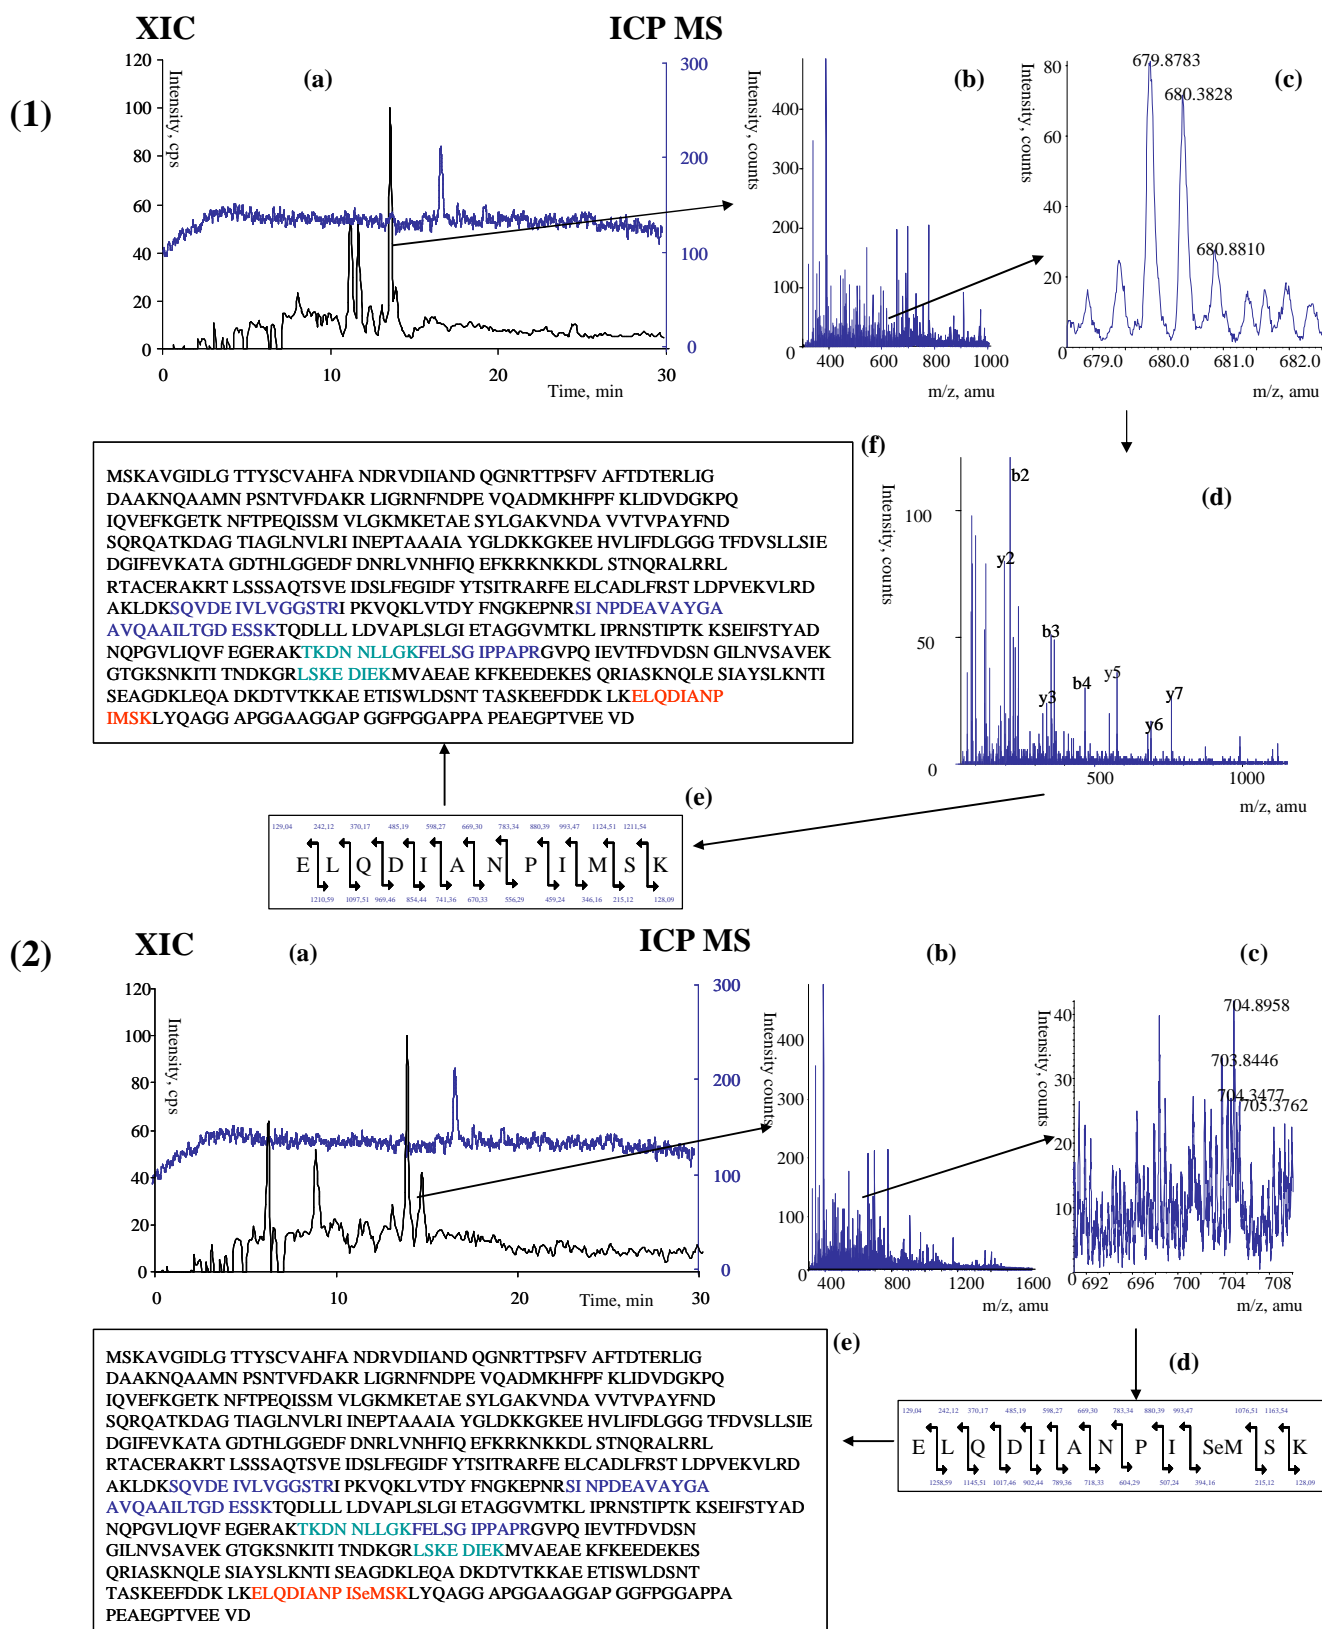

**Figure 4:** Spot 2. Identification of selenium – containing HSP SSA1.

- (1): Identification of the sulfur homologue. (a) : NanoHPLC-ICP MS and NanoHPLC-ESI MS/MS analysis. (b) : ESI MS spectrum. (c) : Zoom of the ESI MS spectrum, S-peptide detection by characteristic isotopic pattern. (d) : ESI MS/MS spectrum. (e) : Peptide sequence identified. (f) : Sequence of the sulfur - containing protein identified by database search.
- (2): Identification of the selenium - containing protein (a) : NanoHPLC-ICP MS and nanoHPLC-ESI MS/MS analysis. (b) : ESI MS spectrum. (c) : Zoom of the ESI MS spectrum, Se-peptide detection by characteristic isotopic pattern. (d) : Peptide sequence identified. (e) : Sequence of the selenium - containing protein identified by database search.

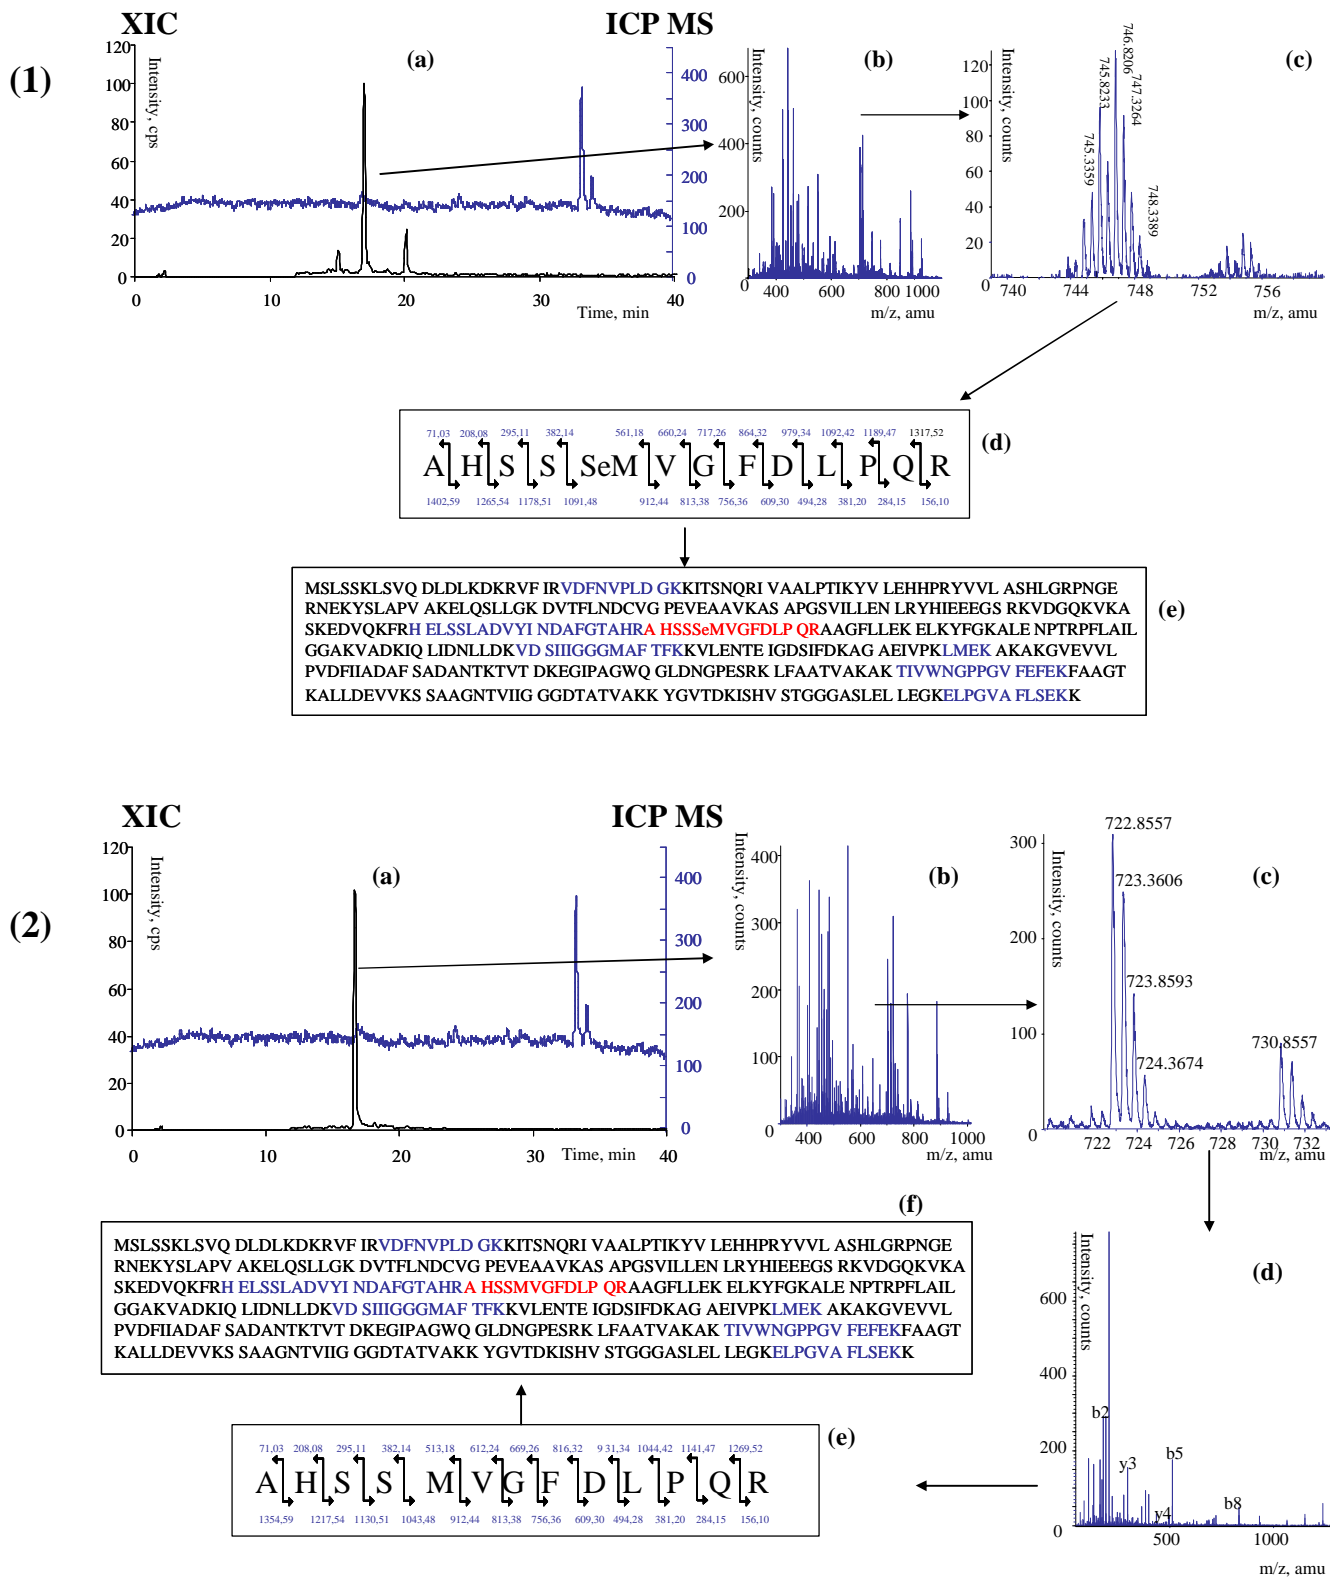

**Figure 5:** Spot 3. Identification of selenium – containing Phosphoglycerate kinase

(1) : Identification of the selenium - containing protein (a) : NanoHPLC-ICP MS and NanoHPLC-ESI MS/MS analysis. (b) : ESI MS spectrum. (c) : Zoom of the ESI MS spectrum, Se-peptide detection by characteristic isotopic pattern. (d) : Peptide sequence identified. (e) : Sequence of the selenium - containing protein identified by database search.

(2) : Identification of the sulfur homologue (a) : NanoHPLC-ICP MS and nanoHPLC-ESI MS/MS analysis. (b) : ESI MS spectrum. (c) : Zoom of the ESI MS spectrum, S-peptide detection by characteristic isotopic pattern. (d) : ESI MS/MS spectrum. (e) : Peptide sequence identified. (f) : Sequence of the sulfur - containing protein identified by database search.

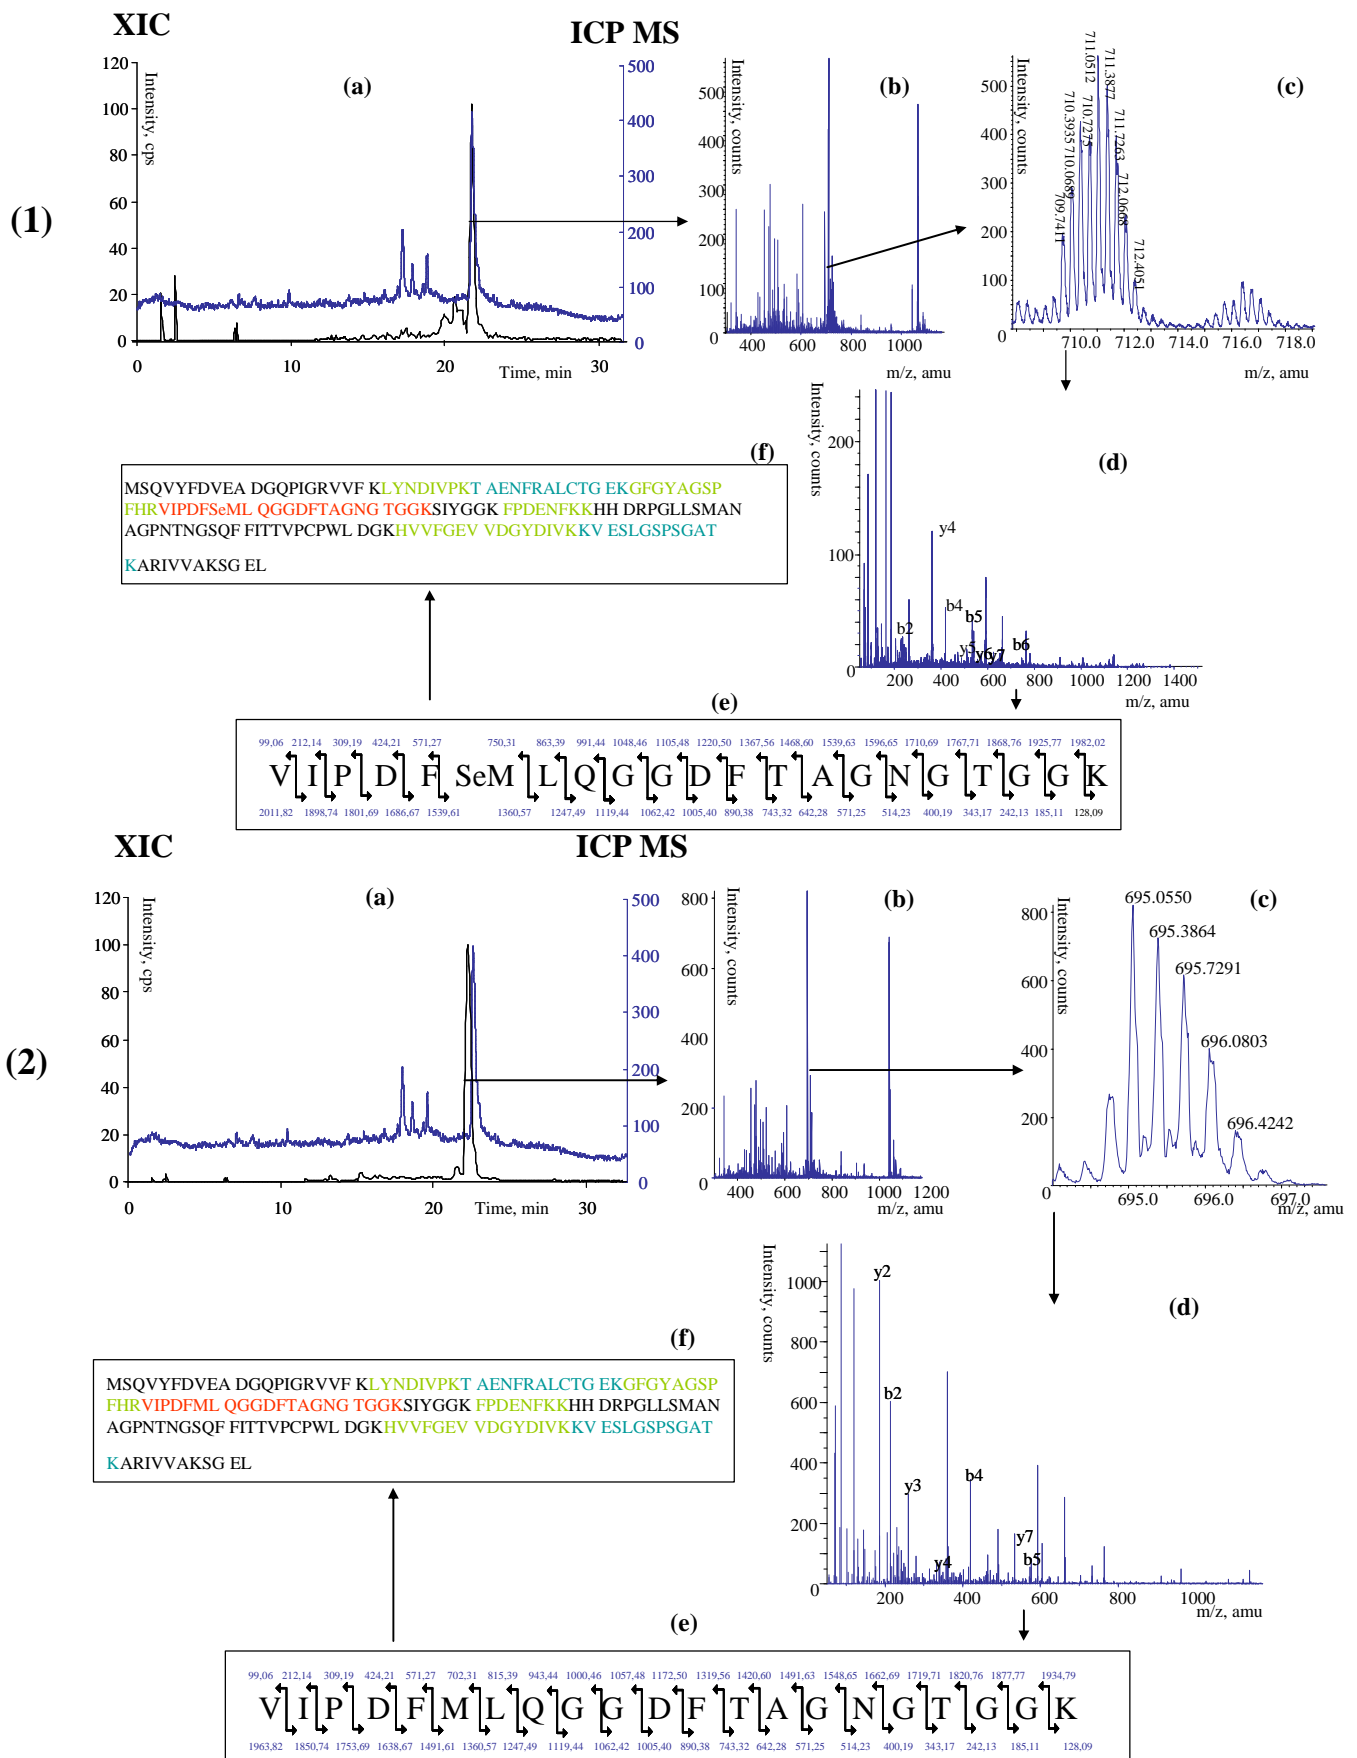

**Figure 6:** Spot 4. Identification of selenium - containing Peptidyl-prolyl cis-trans isomerase.

(1) : Identification of the selenium - containing protein. (2) : Identification of the sulfur homologue.

(a) : NanoHPLC-ICP MS and NanoHPLC-ESI MS/MS analysis. (b) : ESI MS spectrum. (c) : Zoom of the ESI MS spectrum, peptide detection by characteristic isotopic pattern. (d) : ESI MS/MS spectrum. (e) : Peptide sequence identified. (f) : Sequence of the protein identified by database search.

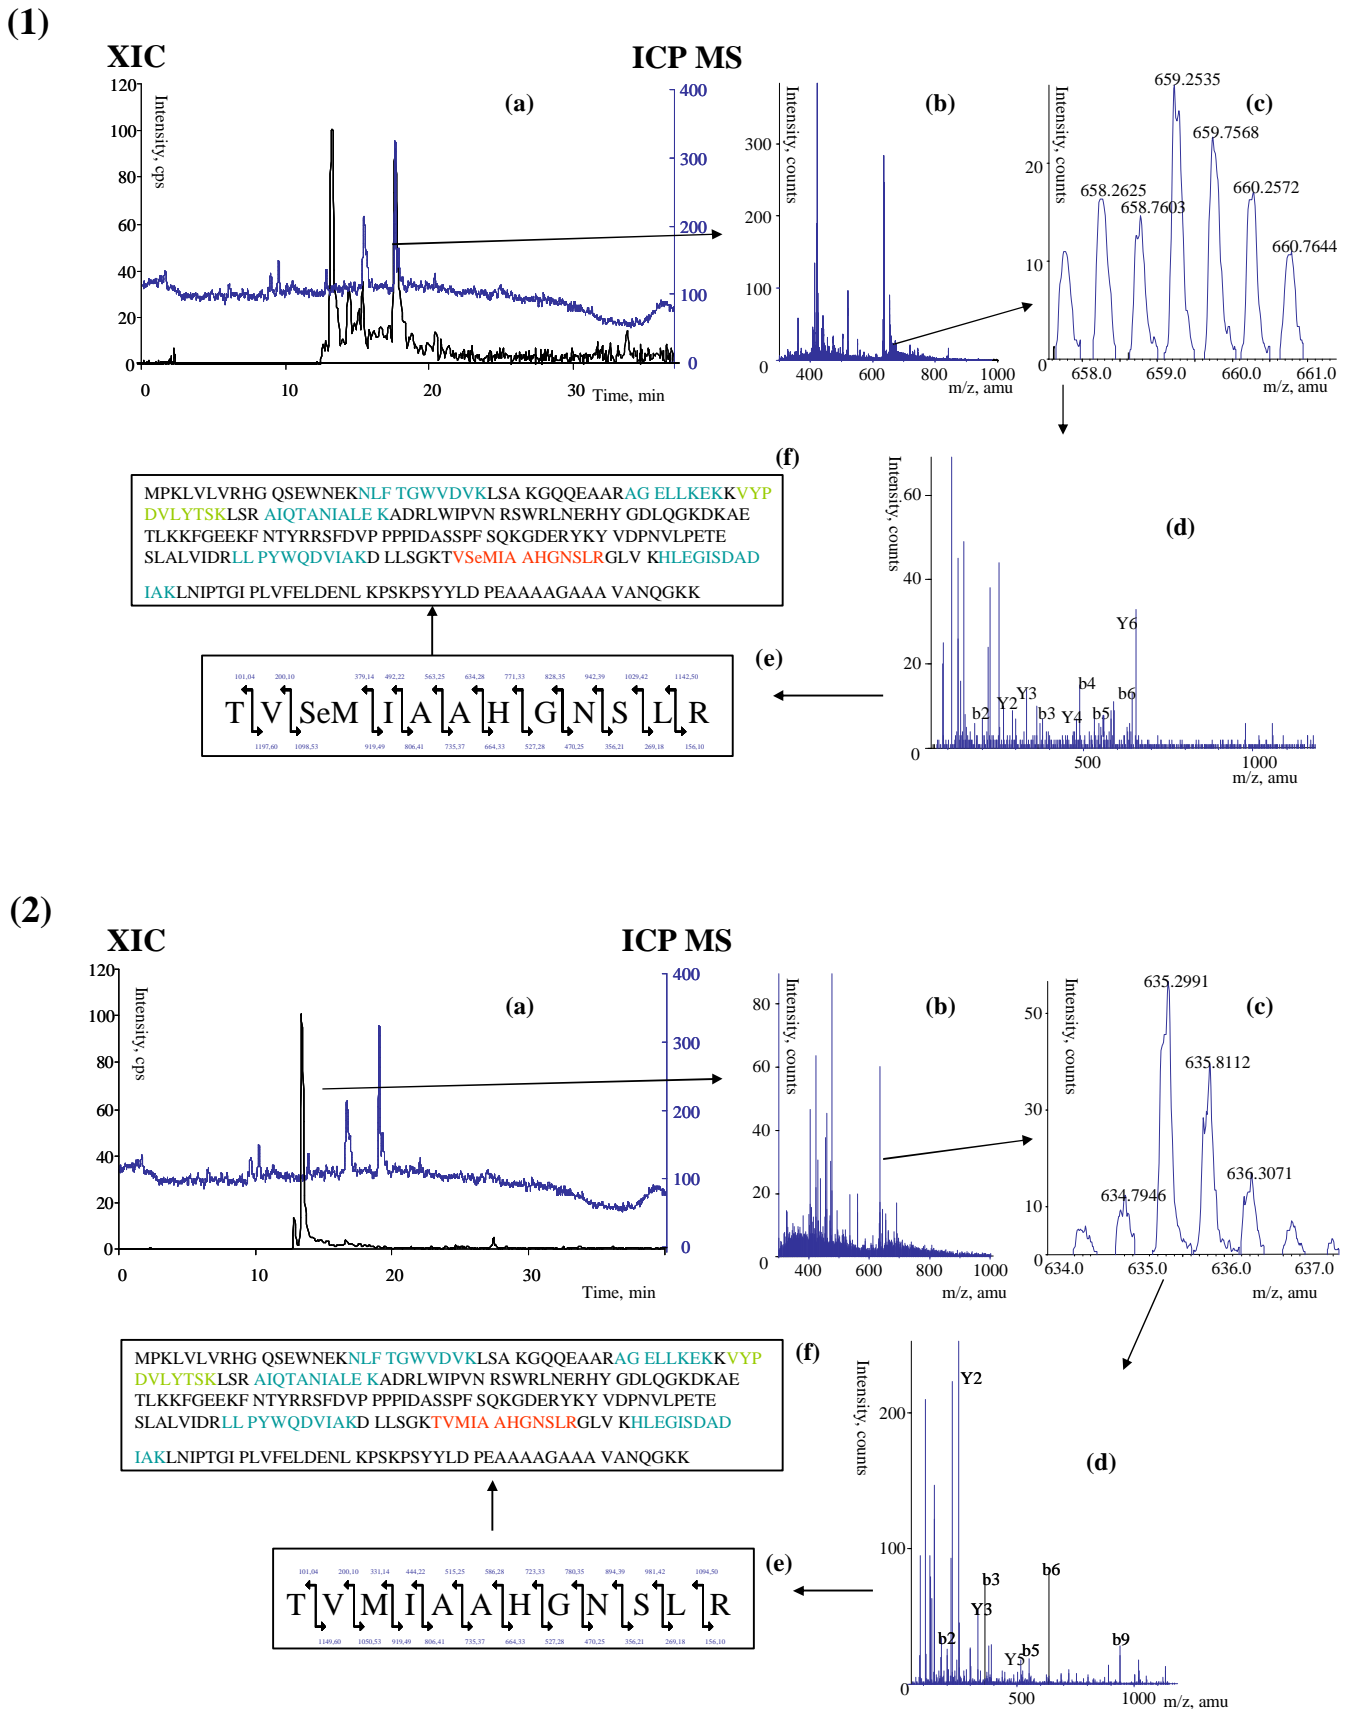

**Figure 7: Spot 8. Identification of selenium - containing Phosphoglycerate mutase 1.**

(1): Identification of the selenium - containing protein. (2): Identification of the sulfur homologue.

(a) : NanoHPLC-ICP MS and NanoHPLC-ESI MS/MS analysis. (b) : ESI MS spectrum. (c) : Zoom of the ESI MS spectrum, peptide detection by characteristic isotopic pattern. (d) : ESI MS/MS spectrum. (e) : Peptide sequence identified. (f) : Sequence of the protein identified by database search.

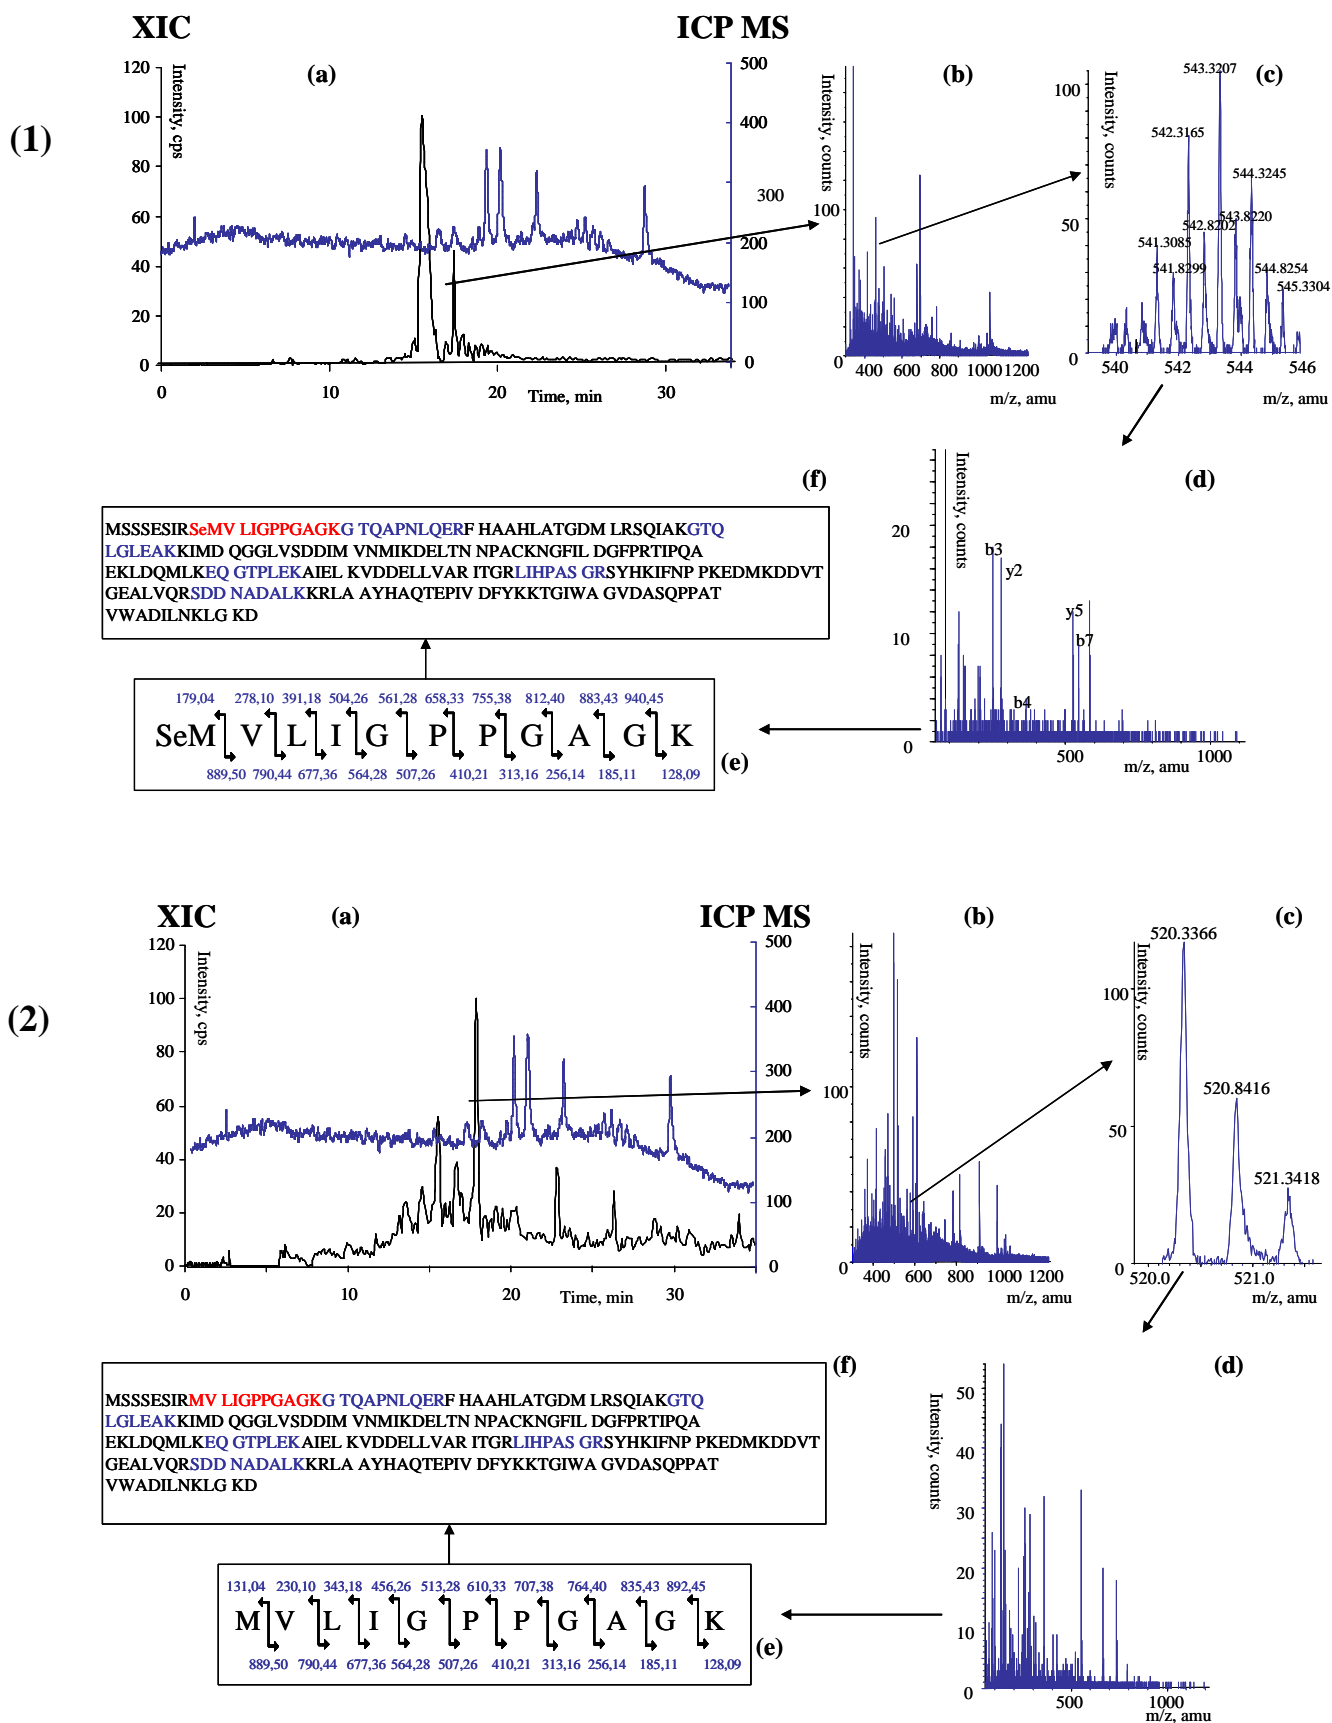

**Figure 8:** Spot 9. Identification of selenium – containing Adenylate kinase.

(1): Identification of the selenium - containing protein. (2): Identification of the sulfur homologue.

(a) : NanoHPLC-ICP MS and NanoHPLC-ESI MS/MS analysis. (b) : ESI MS spectrum. (c) : Zoom of the ESI MS spectrum, peptide detection by characteristic isotopic pattern. (d) : ESI MS/MS spectrum. (e) : Peptide sequence identified. (f) : Sequence of the protein identified by database search.



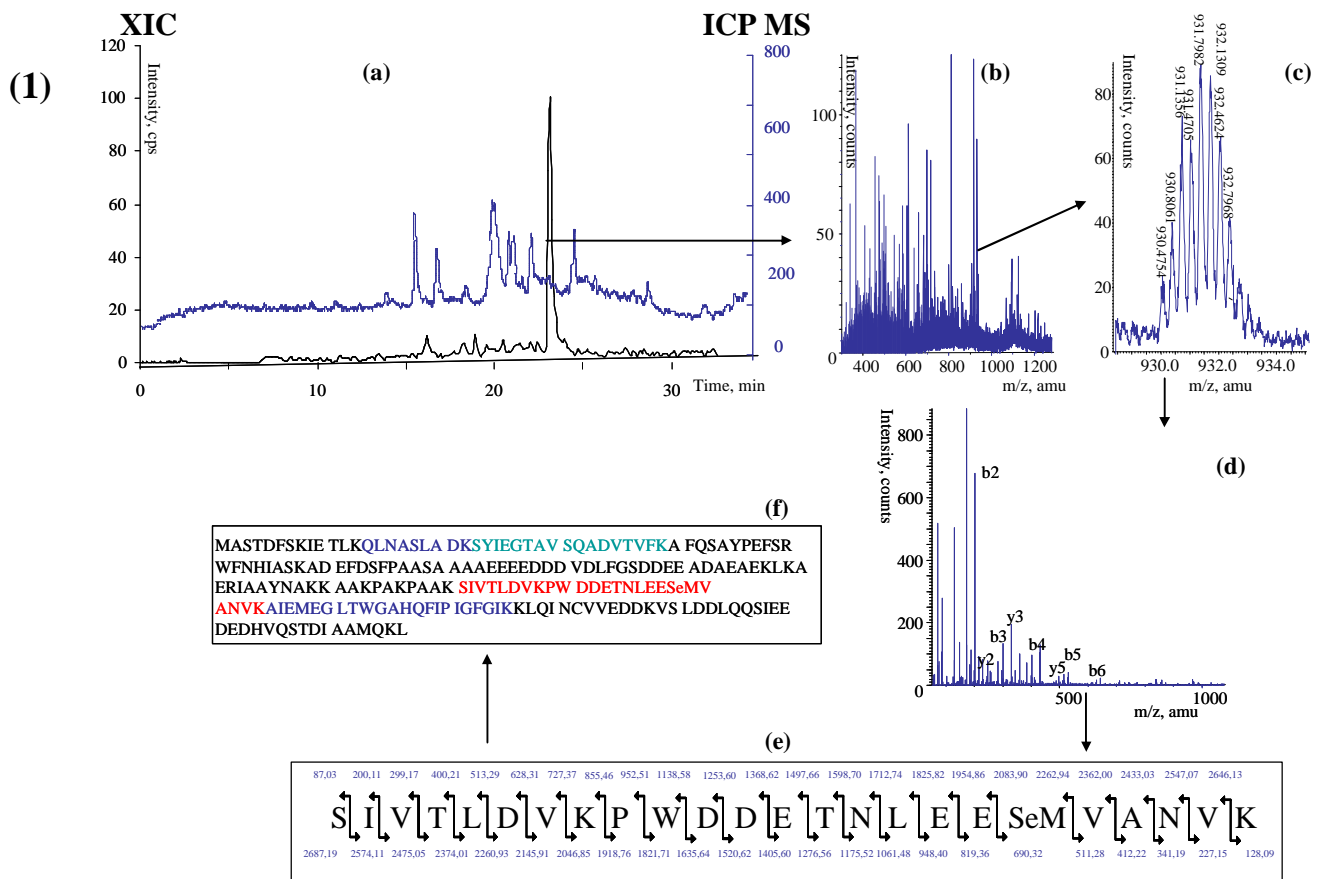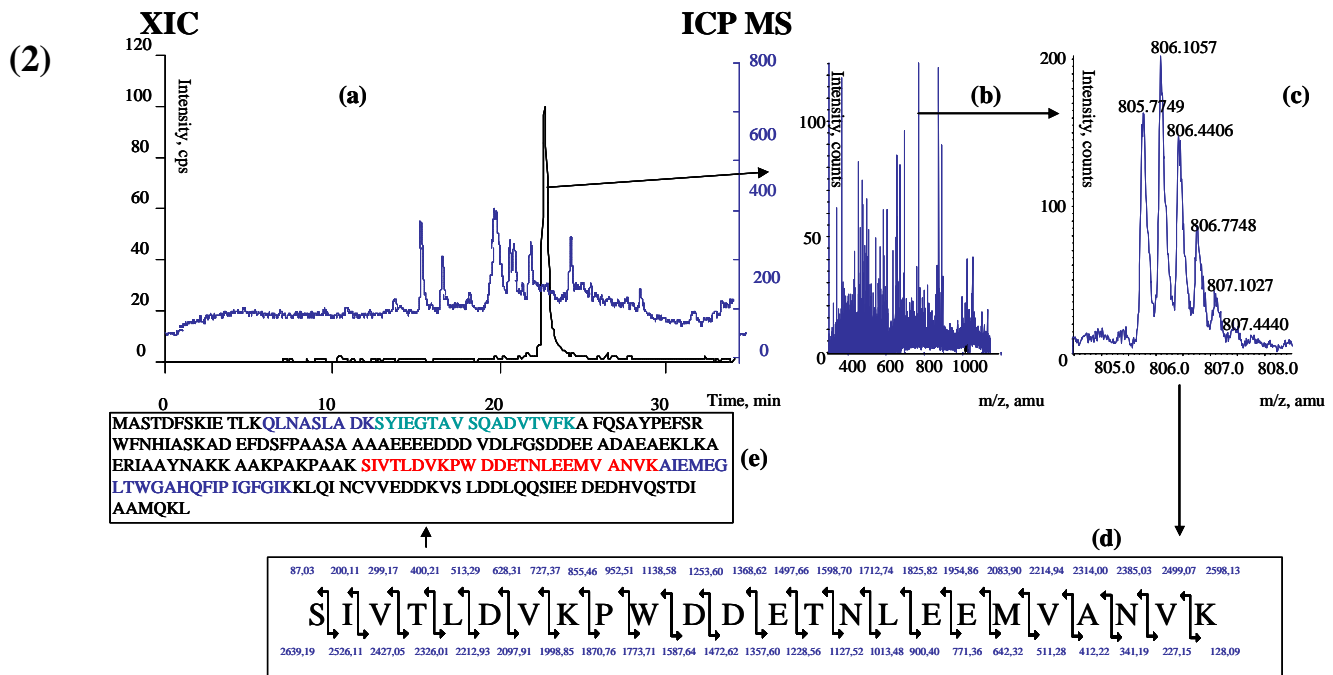

**Figure 9:** Spot 9. Identification of selenium - containing Elongation factor 1-beta.

(1) : Identification of the selenium - containing protein. (a) : NanoHPLC-ICP MS and NanoHPLC-ESI MS/MS analysis. (b) : ESI MS spectrum. (c) : Zoom of the ESI MS spectrum, Se-peptide detection by characteristic isotopic pattern. (d) : ESI MS/MS spectrum. (e) : peptide sequence identified. (f) : Sequence of the selenium - containing protein identified by database search.

(2): Identification of the sulfur homologue. (a) : NanoHPLC-ICP MS and nanoHPLC-ESI MS/MS analysis. (b) : ESI MS spectrum. (c) : Zoom of the ESI MS spectrum, S-peptide detection by characteristic isotopic pattern. (d) : peptide sequence identified. (e) : Sequence of the sulfur - containing protein identified by database search.

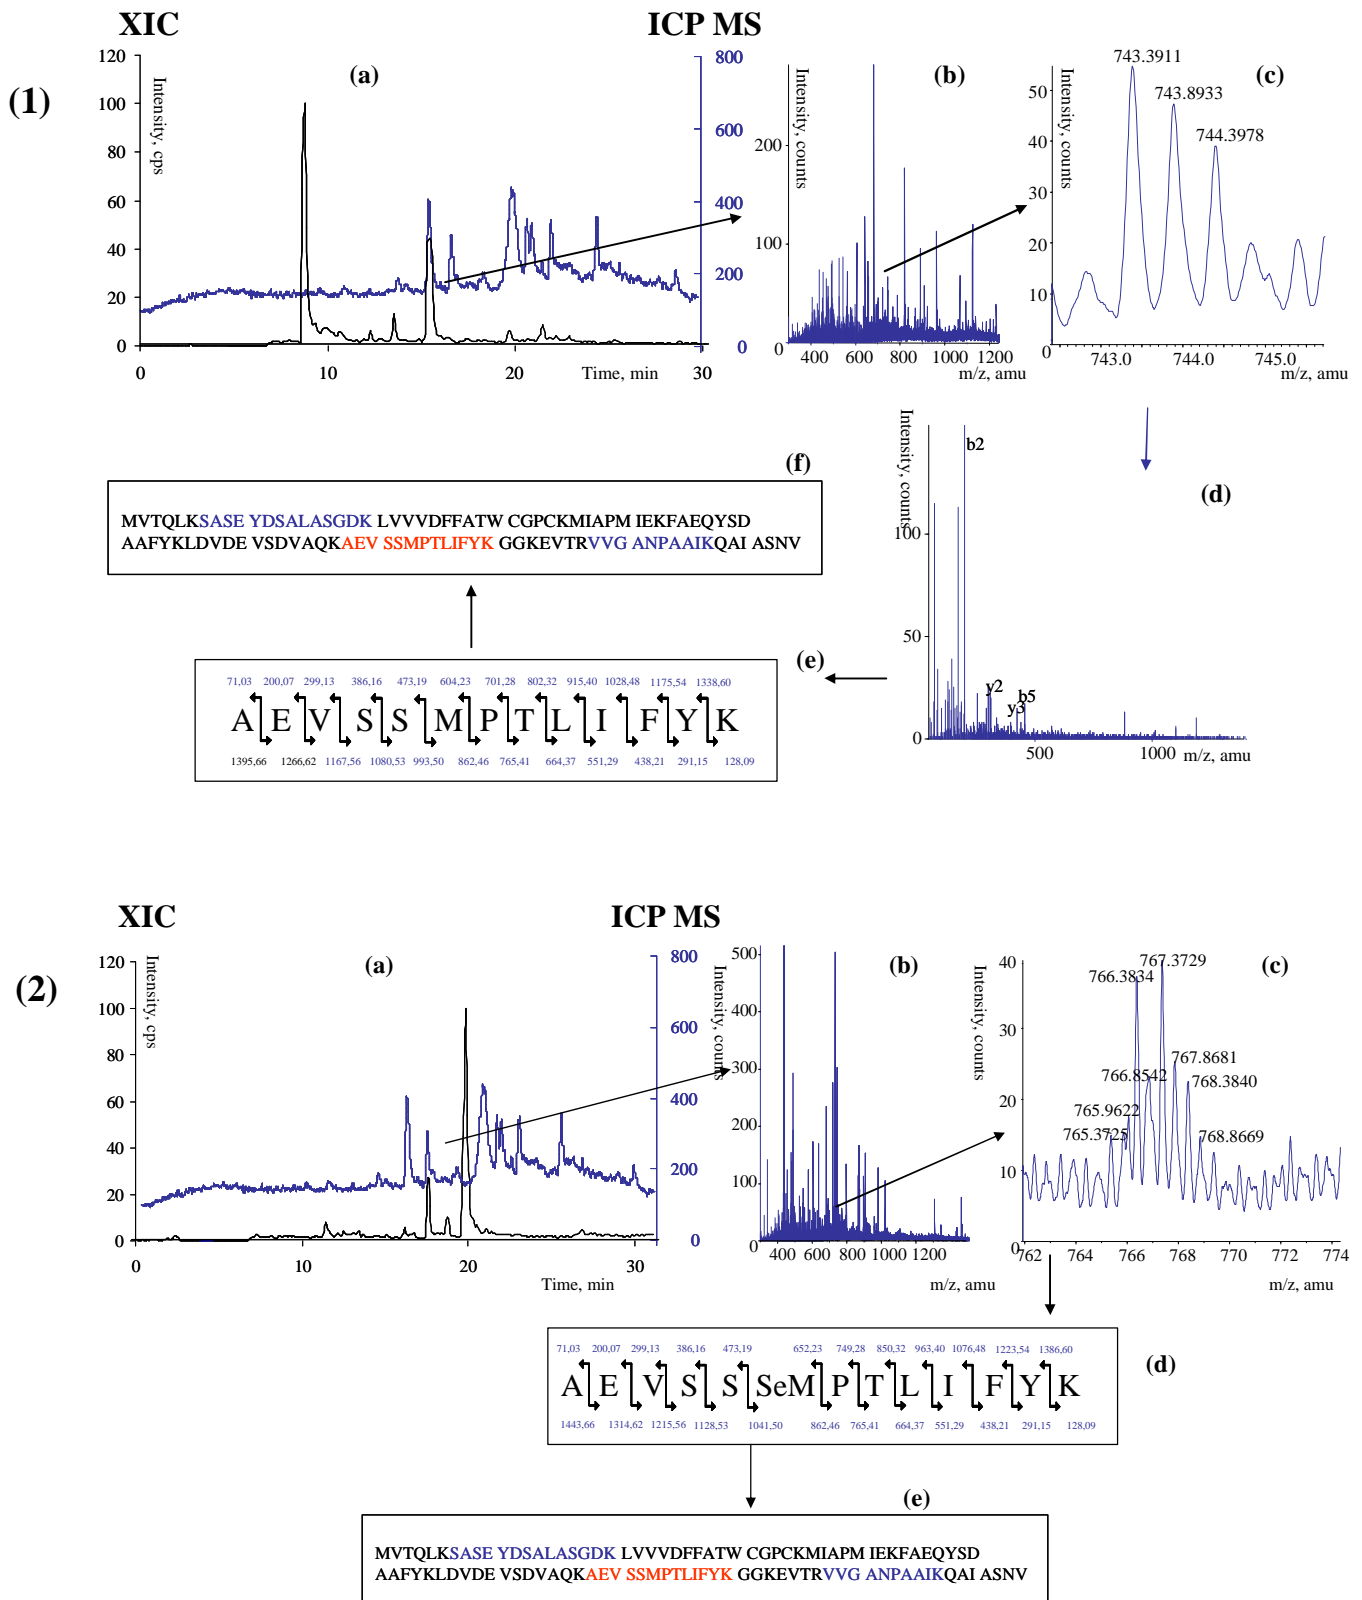

**Figure 10:** Spot 9. Identification of selenium – containing Thioredoxin II.

(1): Identification of the sulfur homologue. (a) : NanoHPLC-ICP MS and NanoHPLC-ESI MS/MS analysis.

(b) : ESI MS spectrum. (c) : Zoom of the ESI MS spectrum, S-peptide detection by characteristic isotopic pattern. (d) : ESI MS/MS spectrum. (e) : Peptide sequence identified. (f) : Sequence of the sulfur - containing protein identified by database search.

(2): Identification of the selenium - containing protein (a) : NanoHPLC-ICP MS and nanoHPLC-ESI MS/MS analysis. (b) : ESI MS spectrum. (c) : Zoom of the ESI MS spectrum, Se-peptide detection by characteristic isotopic pattern. (d) : Peptide sequence identified. (e) : Sequence of the selenium - containing protein identified by database search.

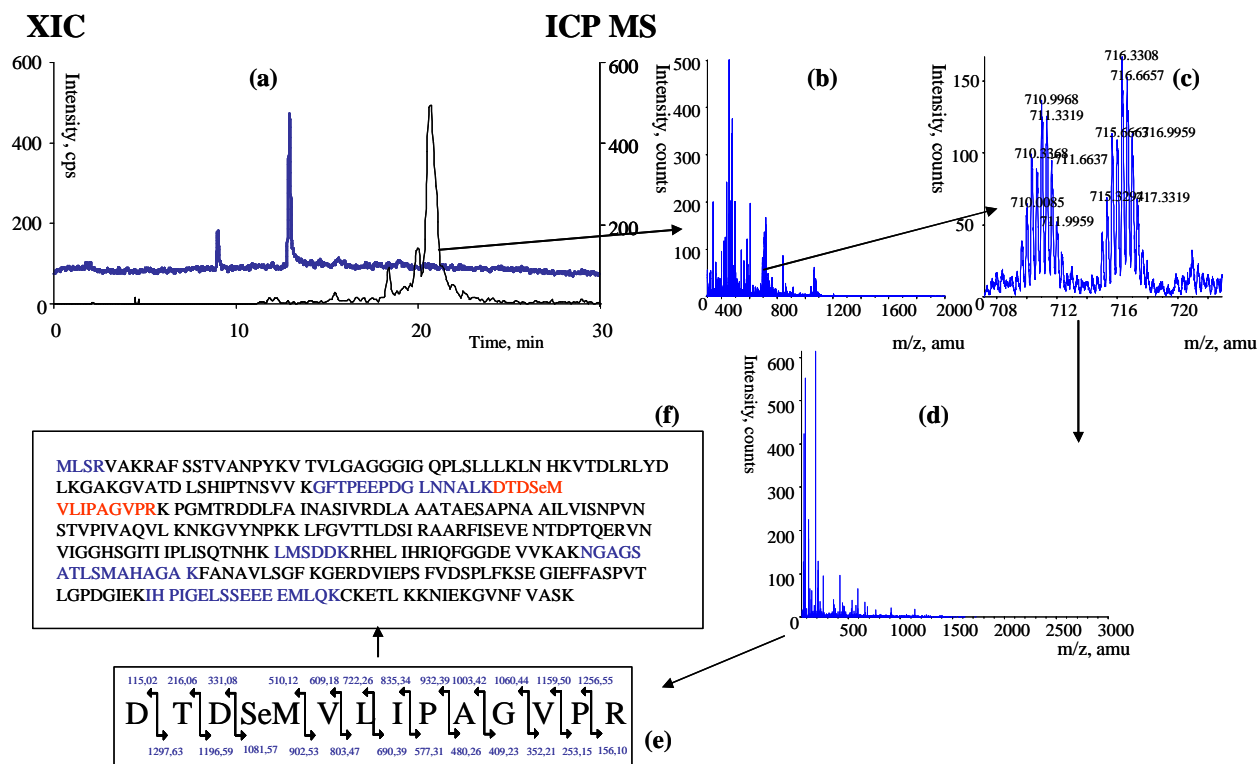

**Figure 11:** Spot 10. Identification of selenium – containing Malate dehydrogenase. (a) : NanoHPLC-ICP MS and NanoHPLC-ESI MS/MS analysis. (b) : ESI MS spectrum. (c) : Zoom of the ESI MS spectrum, Se-peptide detection by characteristic isotopic pattern. (d) : ESI MS/MS spectrum. (e) : Peptide sequence identified. (f) : Sequence of the selenium - containing protein identified by database search.

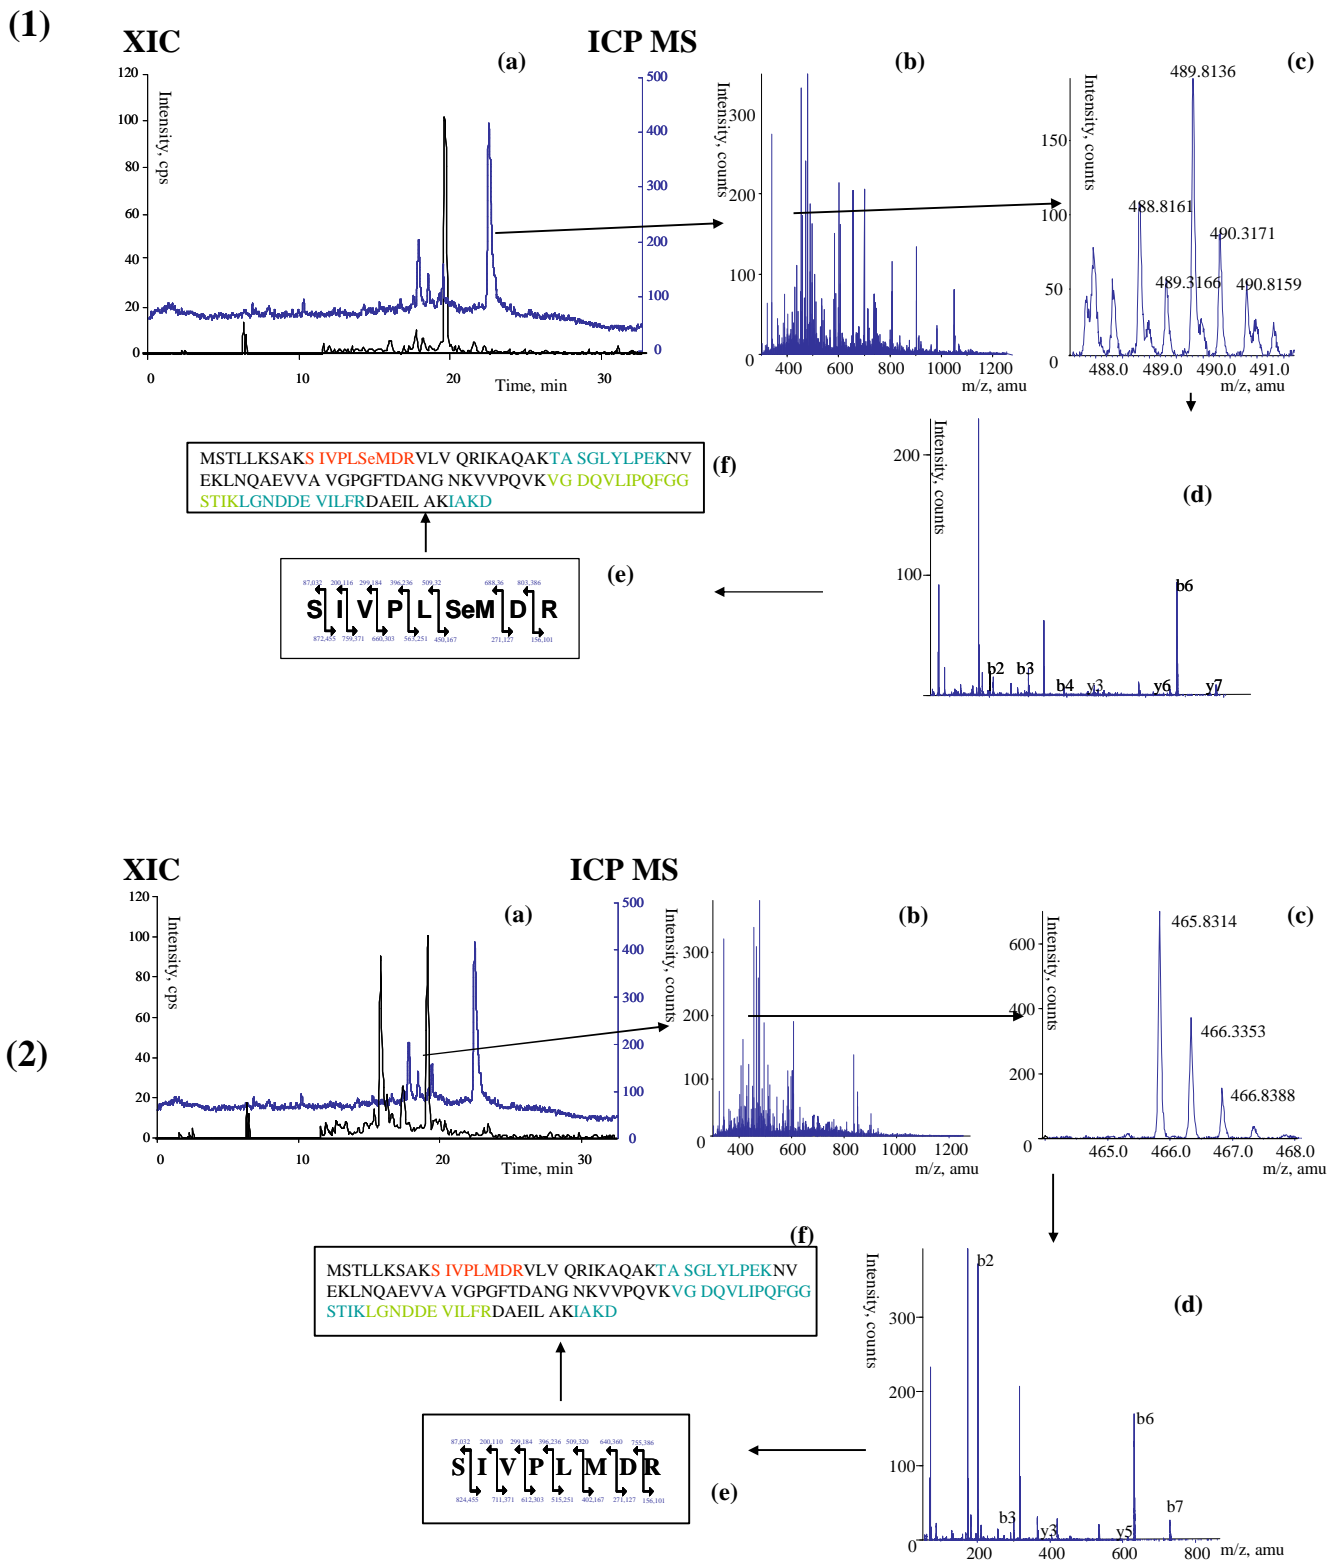

**Figure 12: Spot 13. Identification of selenium - containing HSP 10.**

(1): Identification of the selenium - containing protein. (2): Identification of the sulfur homologue.

(a) : NanoHPLC-ICP MS and NanoHPLC-ESI MS/MS analysis. (b) : ESI MS spectrum. (c) : Zoom of the ESI MS spectrum, peptide detection by characteristic isotopic pattern. (d) : ESI MS/MS spectrum. (e) : Peptide sequence identified. (f) : Sequence of the protein identified by database search.

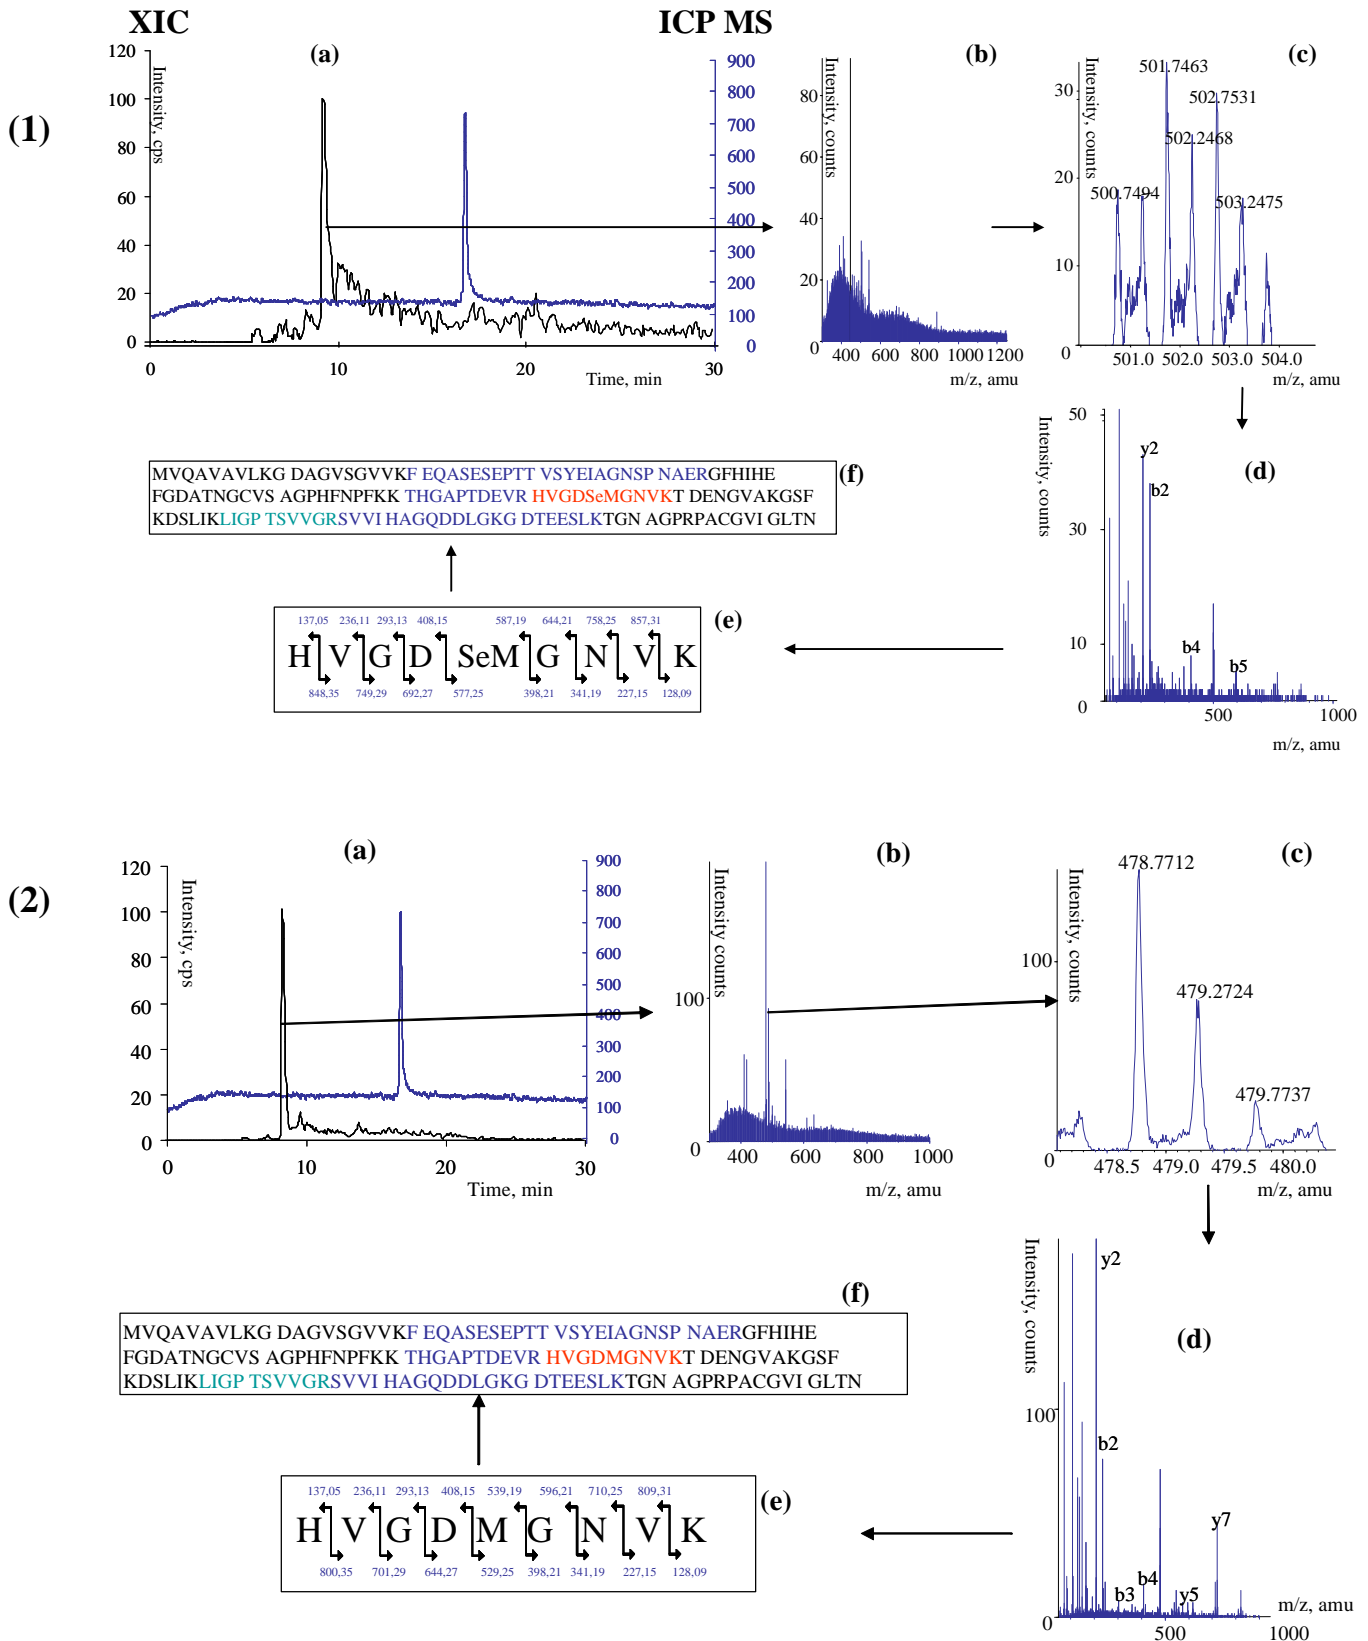

**Figure 13:** Spot 14. Identification of selenium - containing Superoxide dismutase. (1): Identification of the selenium - containing protein. (2): Identification of the sulfur homologue. (a) : NanoHPLC-ICP MS and NanoHPLC-ESI MS/MS analysis. (b) : ESI MS spectrum. (c) : Zoom of the ESI MS spectrum, peptide detection by characteristic isotopic pattern. (d) : ESI MS/MS spectrum. (e) : Peptide sequence identified. (f) : Sequence of the protein identified by database search.
